# Supplementary material for: Shaoyao Gancao Tang (SG-Tang), a formulated Chinese medicine, reduces aggregation and exerts neuroprotection in spinocerebellar ataxia type 17 (SCA17) cell and mouse models
Source: Aging (Albany NY). 2019 Feb 13;11(3):986–1007. doi: 10.18632/aging.101804 (PMC6382417; doi:10.18632/aging.101804)
Supplement: Supplementary Figures [file aging-11-101804-s001.pdf]

## SUPPLEMENTARY MATERIAL

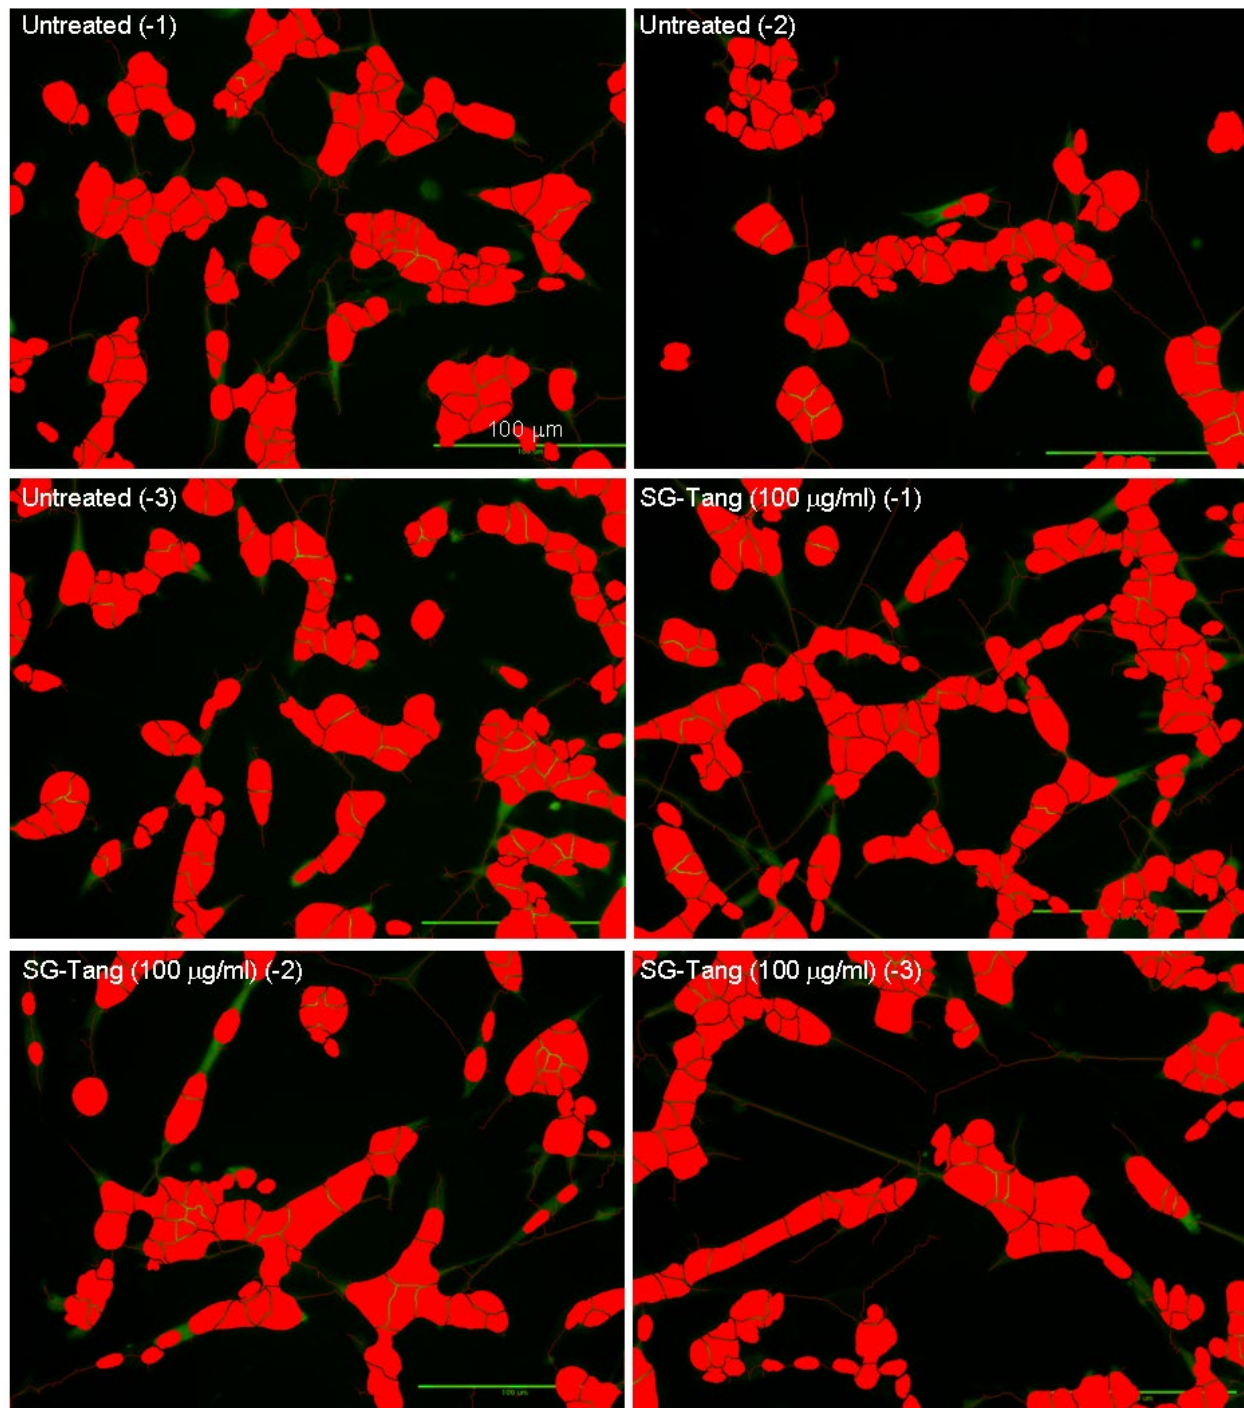

**Supplementary Figure 1.** Microscopic images of differentiated TBP/Q79-GFP SH-SY5Y cells untreated or treated with SG-Tang (100  $\mu\text{g/ml}$ ) in triplicate (-1, -2, and -3), with neurites and cell bodies being outlined by red color for outgrowth quantification.

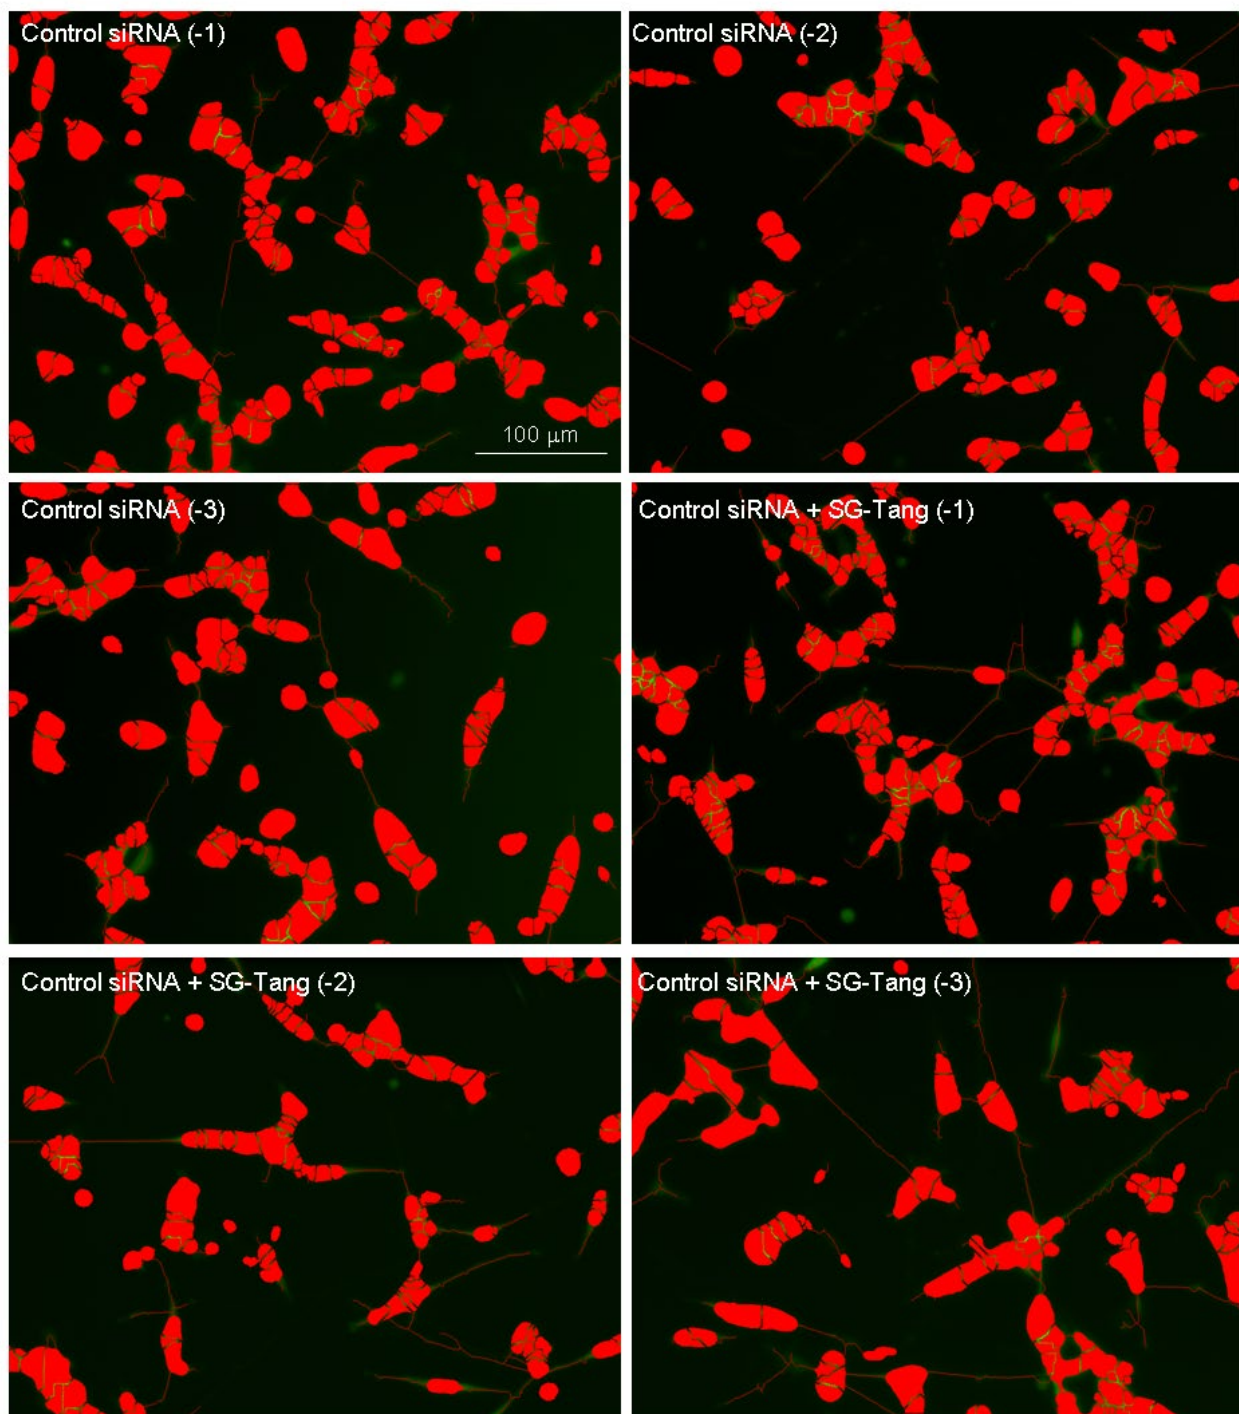

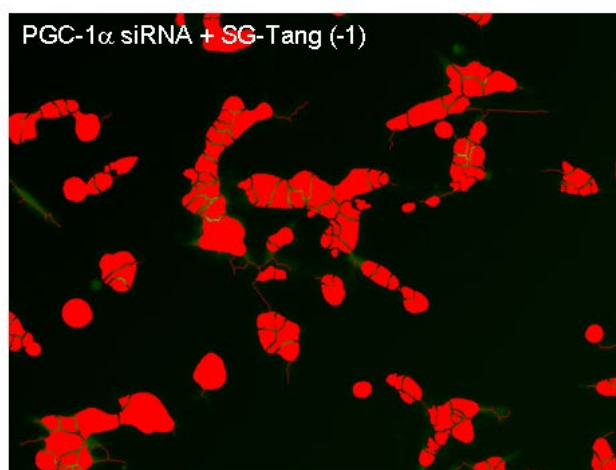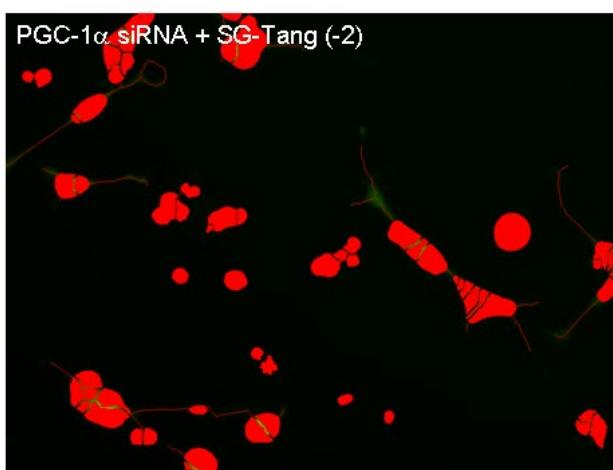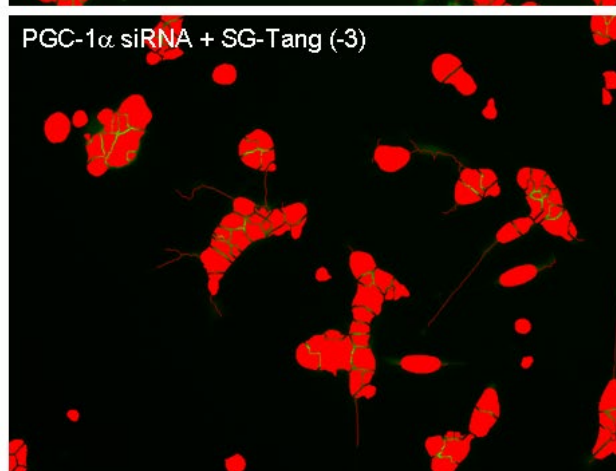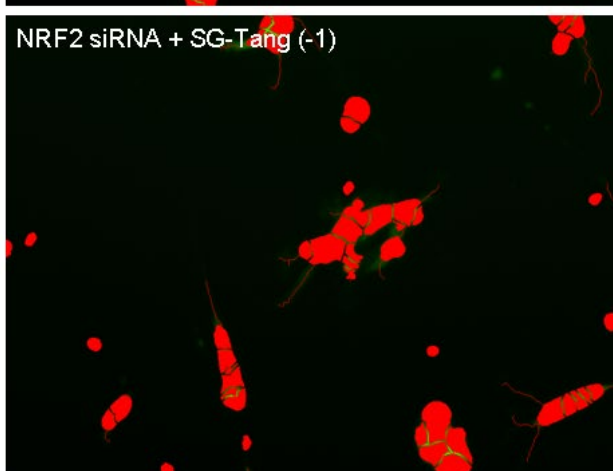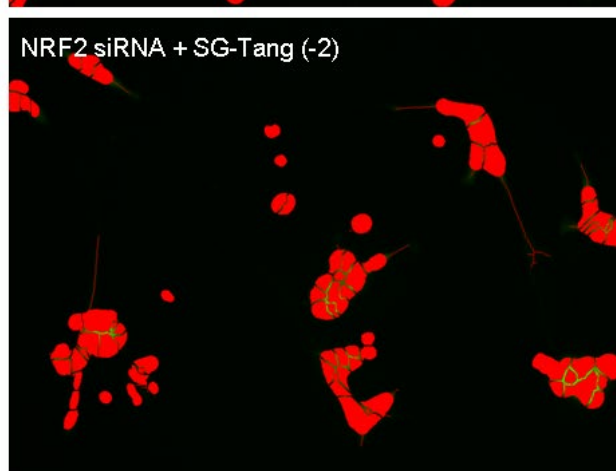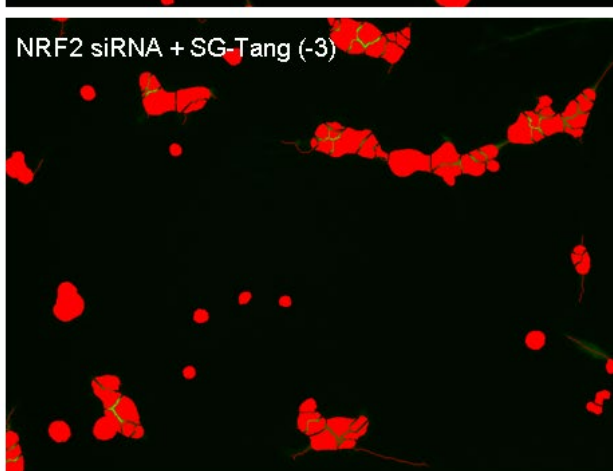

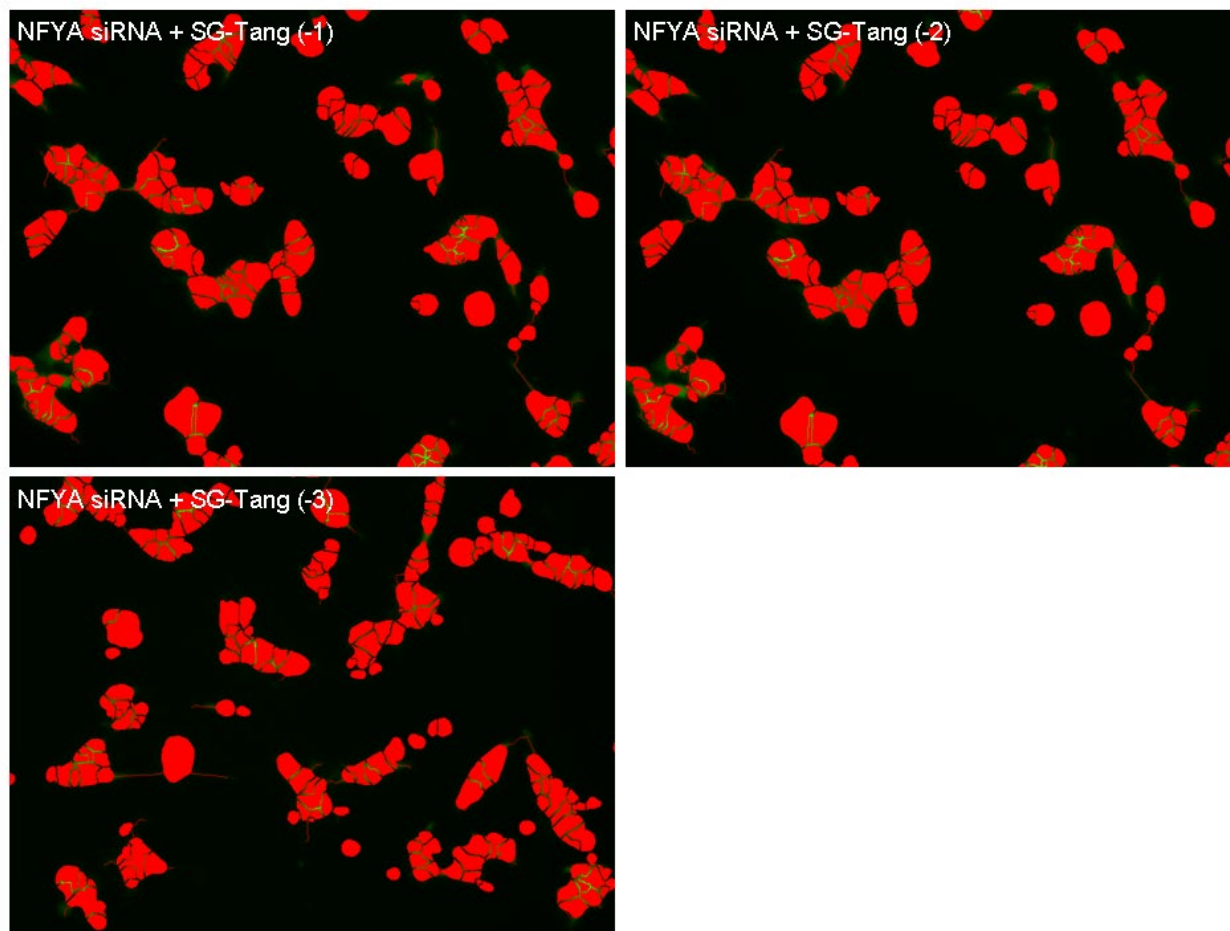

**Supplementary Figure 2.** Microscopic images of TBP/Q<sub>79</sub>-GFP SH-SY5Y cells transfected with scrambled control siRNA and SG-Tang-treated cells transfected with scrambled control, PGC-1 $\alpha$ , NRF2, or NFYA siRNA in triplicate (-1, -2, and -3). Neurites and cell bodies were outlined by red color for outgrowth quantification.
